# Supplementary material for: Germination and Early Seedling Development in Quercus ilex Recalcitrant and Non-dormant Seeds: Targeted Transcriptional, Hormonal, and Sugar Analysis
Source: Front Plant Sci. 2018 Oct 22;9:1508. doi: 10.3389/fpls.2018.01508 (PMC6204751; doi:10.3389/fpls.2018.01508)
Supplement: TABLE S1 — Primers used in this work for the determination of Q. ilex sequences. Primers based on orthologous sequences were designed to obtain partial coding sequences of Q. ilex genes. [file Table_1.XLSX]

## Sheet: Table 1 primers secuenciar sin
	Supplementary Table S1. Primers used in this work for the determination of Q. ilex sequences. Primers based on orthologous sequences were designed to obtain partial coding sequences of Q. ilex genes.
				Genebank Acc. number		Sequence 5´-3´b		Lengthc (bp)
		Targeta
		Fdh		AJ577266	F:	TCACTAGGCATCTTCATGCTTCTCCTGG		545
					R:	CCCAGCACCAACAGTTCCAACTGTC
		Gst		DQ673318	F:	GCGGGCAAGGTGGTTCTGTTGGATTT		584
					R:	GCCACAGCCTCCTTCTGCATGCAC
		GolS		XM_002515187	F:	GATTACATTAAAGGCGTTGTTGGGTTGG		729
					R:	CTCCATATTCTCTTCTTTGCCAGTATATCTCC
		Nadh6		FJ669574	F:	TGATGGTTGCACGTGCTAAAAATCC		360
					R:	TCCAACTTCGTACCTTTCCGGCATAAA
		Ocp3		XM_002324251	F:	CCACTCTTTTCCGAGGCAGGTTTGTGAC		261
					R:	CTCTTTTCCGAGGCAGGTTTGTGAC
		Sdir1		NM_115410	F:	AAGACATGAGCTTTGTTTTCCGGGGAAG		530
					R:	AGGATCCAACACCTTGTACTTGTGAACTGG
		Skp1		XM_002510530	F:	ACTAGCAGGAAAATCACTTTGAAGAGTTCTGAC		461
					R:	AAGGCCCACTGATTTTCTCTCCGAAC
		aGene symbols are according to the NCBI Gene database. bSequence of forward (F) and reverse (R) primers specific for Q. ilex gene sequences cPCR product size in base pair (bp).
